# Supplementary material for: SSRI Treatment Response Prediction in Depression Based on Brain Activation by Emotional Stimuli
Source: Frontiers journal article supplement (doi:10.3389/fpsyt.2020.538393), 2020-11-13
Supplement: Data_Sheet_1.PDF [file Data_Sheet_1.PDF]

## Supplementary Material

### Tables

#### Table S1

##### Descriptive Statistics

S.D.: Standard deviation, BDI: Beck Depression inventory, HAM-D: Hamilton Depression scale, MADRS: Montgomery–Åsberg Depression Rating Scale, EPI: Eysenck Personality Inventory, ERQ: Emotion Regulation Questionnaire, CTQ: Childhood Trauma Questionnaire  
Indicated are demographical facts as well as mean questionnaire scores of all participants, as well as divided into subgroups of responders and non-responders.

There were no significant differences between responders and non-responders regarding the results of EPI, ERQ, or CTQ.

<sup>1</sup> 5-9 none to minimal, 10-14 low to moderate, 15-17 moderate to severe,  $\geq 18$  severe to extreme

<sup>2</sup>  $\geq 5$  none to minimal, 6-7 low to moderate, 8-12 moderate to severe,  $\geq 13$  severe to extreme

<sup>3</sup> 5-7 none to minimal, 8-9 low to moderate, 10-12 moderate to severe,  $\geq 13$  severe to extreme

<sup>4</sup> 5-8 none to minimal, 9-12 low to moderate, 13-15 moderate to severe,  $\geq 16$  severe to extreme

|                                    | All      |             |             | Responder |             |             | Non-responder |             |             |
|------------------------------------|----------|-------------|-------------|-----------|-------------|-------------|---------------|-------------|-------------|
|                                    | <i>n</i> |             | <i>S.D.</i> | <i>n</i>  |             | <i>S.D.</i> | <i>n</i>      |             | <i>S.D.</i> |
| BDI T1                             | 22       | <b>27.0</b> | 8.0         | 8         | <b>30.0</b> | 7.3         | 14            | <b>25.2</b> | 8.2         |
| BDI T6                             | 22       | <b>18.4</b> | 12.0        | 8         | <b>8.5</b>  | 4.3         | 14            | <b>24.1</b> | 11.2        |
| HAM-D T1                           | 22       | <b>25.5</b> | 6.1         | 8         | <b>26.3</b> | 4.5         | 14            | <b>25</b>   | 6.9         |
| HAM-D T6                           | 22       | <b>18.1</b> | 10.1        | 8         | <b>8.3</b>  | 5.7         | 14            | <b>23.6</b> | 9.1         |
| MADRS T1                           | 22       | <b>28.6</b> | 7.4         | 8         | <b>30.5</b> | 7.3         | 14            | <b>27.6</b> | 7.6         |
| MADRS T6                           | 21       | <b>20.4</b> | 10.1        | 7         | <b>9.9</b>  | 3.7         | 14            | <b>25.7</b> | 7.7         |
| <b><i>EPI</i></b>                  |          |             |             |           |             |             |               |             |             |
| Neuroticism                        | 22       | <b>17.4</b> | 8.7         | 8         | <b>19.3</b> | 13.6        | 14            | <b>16.3</b> | 4.4         |
| Extraversion                       | 22       | <b>10.2</b> | 4.7         | 8         | <b>12.4</b> | 5.9         | 14            | <b>9.0</b>  | 3.4         |
| Lying                              | 22       | <b>4.8</b>  | 1.8         | 8         | <b>5.0</b>  | 2.4         | 14            | <b>4.7</b>  | 1.4         |
| <b><i>ERQ</i></b>                  |          |             |             |           |             |             |               |             |             |
| Reappraisal                        | 21       | <b>3.8</b>  | 1.1         | 7         | <b>4.0</b>  | 1.2         | 14            | <b>3.7</b>  | 1.1         |
| Suppression                        | 21       | <b>3.5</b>  | 1.1         | 7         | <b>2.9</b>  | 0.7         | 14            | <b>3.7</b>  | 1.2         |
| <b><i>CTQ</i></b>                  |          |             |             |           |             |             |               |             |             |
| Emotional neglect <sup>1</sup>     | 22       | <b>13</b>   | 4.9         | 8         | <b>12</b>   | 4.4         | 14            | <b>13.6</b> | 5.3         |
| Sexual abuse <sup>2</sup>          | 22       | <b>6.9</b>  | 3.5         | 8         | <b>7.4</b>  | 3.2         | 14            | <b>6.6</b>  | 3.7         |
| Physical abuse <sup>3</sup>        | 22       | <b>7</b>    | 2.7         | 8         | <b>7.5</b>  | 4.0         | 14            | <b>6.6</b>  | 1.7         |
| Emotional abuse <sup>4</sup>       | 22       | <b>9.8</b>  | 4.7         | 8         | <b>9.3</b>  | 5.6         | 14            | <b>10.1</b> | 4.4         |
| Physical neglect <sup>3</sup>      | 22       | <b>8.3</b>  | 2.9         | 8         | <b>7.9</b>  | 3.0         | 14            | <b>8.6</b>  | 2.9         |
| <b><i>Mean picture ratings</i></b> |          |             |             |           |             |             |               |             |             |
| All                                | 21       | <b>5.0</b>  | 0.4         | 8         | <b>4.9</b>  | 0.4         | 13            | <b>5.1</b>  | 0.4         |
| Positive                           | 21       | <b>7.6</b>  | 1.2         | 8         | <b>7.2</b>  | 1.7         | 13            | <b>7.9</b>  | 0.7         |
| Negative                           | 21       | <b>2.2</b>  | 0.7         | 8         | <b>2.4</b>  | 0.9         | 13            | <b>2.1</b>  | 0.7         |

**Table S2****Paired sample T-Test for depression**

T1: pre-treatment, T6: post-treatment, S.D.: Standard deviation, Std.: standard, C.I.: Confidence Interval, *t*: *t*-value, df: degrees of freedom, Sig.: significance (2-tailed), BDI: Beck Depression inventory, HAM-D: Hamilton Depression scale, MADRS: Montgomery–Åsberg Depression Rating Scale,

Presented are the results of paired sample T-Tests for pre- and posttreatment depression first for the whole sample, demonstrating a significant reduction of scores after treatment, as well as for the group of responders and non-responders on their own.

|                       | Mean   | S.D.   | Std.<br>Error<br>Mean | 95% C.I. of the<br>Difference |        | t      | df | Sig. |
|-----------------------|--------|--------|-----------------------|-------------------------------|--------|--------|----|------|
|                       |        |        |                       | Lower                         | Upper  |        |    |      |
| BDI T1 – BDI T6       | 8.545  | 12.031 | 2.565                 | 3.211                         | 13.880 | 3.332  | 21 | .003 |
| HAM-D T1 – HAM-D T6   | 7.409  | 10.340 | 2.205                 | 2.824                         | 11.994 | 3.361  | 21 | .003 |
| MADRS T1 – MADRS T6   | 8.333  | 11.297 | 2.465                 | 3.191                         | 13.476 | 3.380  | 20 | .003 |
| <b>Responders</b>     |        |        |                       |                               |        |        |    |      |
| BDI T1 – BDI T6       | 21.500 | 6.414  | 2.268                 | 16.138                        | 26.862 | 9.481  | 7  | .000 |
| HAM-D T1 – HAM-D T6   | 18.000 | 4.957  | 1.753                 | 13.856                        | 22.144 | 10.271 | 7  | .000 |
| MADRS T1 – MADRS T6   | 21.286 | 7.296  | 2.758                 | 14.538                        | 28.034 | 7.718  | 6  | .000 |
| <b>Non-responders</b> |        |        |                       |                               |        |        |    |      |
| BDI T1 – BDI T6       | 1.143  | 7.026  | 1.878                 | -2.914                        | 5.199  | 0.609  | 13 | .553 |
| HAM-D T1 – HAM-D T6   | 1.357  | 7.143  | 1.909                 | -2.767                        | 5.481  | 0.711  | 13 | .490 |
| MADRS T1 – MADRS T6   | 1.857  | 6.024  | 1.610                 | -1.621                        | 5.335  | 1.154  | 13 | .269 |
